# Supplementary material
Source: publisher figshare collection journal article supplement (https://gsajournals.figshare.com/ndownloader/files/31324588)
Supplement: Supplementary file 1 [file 31324588]

## Sheet: Planilha1
Name	Genome location	Size	Super family	ORF1- GAG	ORF2 - RT/RH	ORF3- YR	Additional
DIRS-1_XT	Chromosome 2	5556pb	DIRS-like	759-2219/lap2alpha 1392-1991	2377-4116/ RT- 2650-3003/ RH 3325-3678	2852-5132/DNA_bre 4755-5012	Orfs 2 and 3 overlaps - phase +1 RT/RH phase+3 lap2alpha/DNA_bre
DIRS-2_XT	Chromosome 5	5992pb	DIRS-like	No ORF1/lap2alpha 1838-2440	2241-4544/RT-3084-3437/RH-3759-4112	No ORF/No domain	Orfs2 and 3 overlaps - phase +3 RT/RH
DIRS-2A_XT	Chromosome 2	6224pb	DIRS-like	1408 2877/ Lap2alpha 2053-2652	3032 4765/RT- 3305-3658 /RH- 3980-4333	3589 5784/DNA_bre 5179-5694	Orfs 2 and 3 overlaps - phase +1 lap2alpha/ DNA_bre phase +2 RT/RH
DIRS-3A_XT	Chromosome 3	5809pb	DIRS-like	1032 2492/Lap2alpha 1674-2273	2647 4380/RT- 2920-3273/RH- 3598-3954	3534 5399/ DNA_bre 4794-5309	Orfs 2 and 3 overlaps - phase +1 RT /RH phase +3 Lap2alpha/DNA_bre
DIRS-3_XT	Chromosome 6	5870pb	DIRS-like	1918-2532/lap2alpha 1702-2301	2688-4421/RT-92-209/RH-318-436	2618-5440/DNA_bre 4835-5350	Orfs 2 and 3 overlaps - phase +2 DNA_bre and phase+3 RT/RH
DIRS-4A_XT	Chromosome 9	5718pb	DIRS-like	964 2349/Lap2alpha 1441-2115	2369 4279/RT-2591-2926 e 2780-3133 /RH- 3461-3811	2413 5268/DNA_bre 4891-5196	Orfs 2 and 3 overlaps - phase+1 Lap2alpha and DNA_bre phase +2 RT and RH
DIRS-4B_XT	Chromosome 1	5380pb	DIRS-like	875 2254/Lap2alpha 1322-2020	2244 3437/RT- 2685-3038/RH- 3366-3716	3083 5173/DNA_bre 4796-5086	Orfs 2 and 3 overlaps - phase +2 DNA_bre and Lap2alpha phase +3 RT and RH
DIRS-4_XT	Chromosome 8	5616pb	DIRS-like	847-2229/Lap2alpha 1321-1995	2348-4159/RT-2660-3007/RH-3341-3691	2293-5145/DNA_bre 4501-5061	Orfs 2 and 3 overlaps - phase +1 DNA_bre and phase+2 RT/RH
DIRS-5_XT	Chromosome 3	5682pb	DIRS-like	884-2323/Lap2alpha 1508-2107	2481- 4217/RT-2754-3107/RH-3432-3788	3305-5236/DNA_bre 4592-5146	Orfs 2 and 3 overlaps - phase +2 DNA_bre and phase+3 RT/RH
DIRS-6A_XT	Chromosome 1	5710pb	DIRS-like	863-2251/Lap2alpha 1436-2035	2824-4104/RT- 2752-3012/RH- 3349-3708	2244-5132/RT- 2478-2765/DNA_bre 4479-5039	Orfs 2 and 3 overlaps - phase +1 RT and RH phase +3 RT and DNA_bre
DIRS-6_XT	Chromosome 1	5814pb	DIRS-like	940-2343/Lap2alpha 1444-2127	2714-4237/RT- 2771-3115/RH- 3452-3811	3055-5265/DNA_bre 4612-5172	Orfs 2 and 3 overlaps- phase +1 DNA_bre and phase +2 RT/RH
DIRS-7_XT	Chromosome 4	5503pb	DIRS-like	721-2187/Lap2alpha 1360-1959	2345-4084/RT- 2618-2971/RH-3293-3652	2275-5169/DNA_bre 4723-5028	Orfs 2 and 3 overlaps - phase+1 DNA_bre and phase +2 RT/RH
DIRS-8A_XT	Chromosome 1	5835pb	DIRS-like	643-2460/Lap2alpha 1525-2226	2804-4387/RT- 2885-3238/RH- 3566-3916	2521-5370/DNA_bre 4996-5301	Orfs 2 and 3 overlaps- phase +1 DNA_bre and phase +2 RT/RH
DIRS-8_XT	Chromosome 5	5898pb	DIRS-like	1277 2527/Lap2alpha 1589-2284	2502 4454/RT-2952-3305 /RH-3633-3983	2588 5437/DNA_bre 5063-5368	Orfs 2 and 3 overlaps- phase +2 DNA_bre and phase +3 RT/RH
DIRS-9A_XT	Chromosome 7	5447pb	DIRS-like	1568 2176 /Lap2alpha 1340-1951	1935 4082/RT-2601-2945/RH- 3282-3632/MT- 3654-3986	3134 5086/DNA_bre 4484-5011	Orfs 1, 2 and 3 sbrepostas - phase +2 Lap2Alpha and DNA_bre and phase+3 RT/RH e MT
DIRS-9_XT	Chromosome 6	5386pb	DIRS-like	940 1881 /Lap2alpha 1195-1854	2366 4027/RT-2546-2890/RH-3227-3574/MT- 3583-3681	2428 5031/DNA_bre 4429-4956	Orfs 2 and 3 overlaps- phase +1 DNA_bre and phase +2 RT/RH and MT
DIRS-10_XT	Chromosome 2	5129pb	DIRS-like	470 1846 /Lap2alpha 1013-1588	1848 3749/RT-2274-2627 /RH-2955-3314/MT-3327-3623	2699 4765/no domain	Orfs 2 and 3 overlaps - phase +2 Lap2alpha and phase +3 RT and RH
DIRS-11_XT	Chromosome 3	5426pb	DIRS-like	658 2118/Lap2alpha 1279-1890	2276 4015/RT- 2549-2902/RH-3224-3583	2467 5028/DNA_bre 4654-4962	Orfs 2 and 3 overlaps- phase +1 DNA_bre and phase +2 RT/RH
DIRS-12_XT	Chromosome 3	5162pb	DIRS-like	649 1917/Lap2Alpha 1009-1698	2276 3817/RT-2333-2698 /RH-3026-3379	1969 4824/DNA_bre 4333-4743	Orfs 2 and 3 overlaps - phase +1 DNA_bre and phase+2 RT/RH
DIRS-13A_XT	Chromosome 7	5629pb	DIRS-like	811 2274/Lap2alpha 1369-2052	2651 4207/RT-2708-3061 /RH- 3389-3739	2965 5199/DNA_bre 4819-5127	Orfs 2 and 3 overlaps - phase +1 DNA_bre and phase+2 RT/RH
DIRS-13B_XT	Chromosome 5	5825pb	DIRS-like	578 2449/Lap2alpha 1634-2227	2259 4382/RT- 2883-3236 /RH- 3564-3914	3416 5374/DNA_bre 4994-5302	Orfs 2 and 3 overlaps - phase +2 DNA_bre and phase+3 RT/RH
DIRS-13C_XT	Chromosome 2	5716pb	DIRS-like	907 2367/lap2alpha 1549-2145	2463 4280/RT- 2928-3173 /RH- 3477-3812	3353 5272/DNA_bre 4664-5182	Orfs 2 and 3 overlaps- phase +2 DNA_bre and phase +3 RT/RH
DIRS-13_XT	Chromosome 8	5777pb	DIRS-like	818 2416/lap2alpha 1601-2194	2793 4349/RT- 2850-3203/RH- 3531-3881	3383 5341/DNA_bre 4691-5251	Orfs 2 and 3 overlaps- phase +2 DNA_bre and phase +3 RT/RH
DIRS-14_XT	Chromosome 2	5878pb	DIRS-like	912 2471/Lap2alpha 1641-2234	2842 4365/RT-2899-3252 /RH- 3580-3939	3183 5384/DNA_bre 4701-5300	Orfs 2 and 3 overlaps- phase +2 RT/RH and phase +3 DNA_bre
DIRS-15_XT	Chromosome 2	5270pb	DIRS-like	703 1854/Lap2alpha 1138-1749	2208 3896/RT- 2211-2771/RH-3105-3461	2069 4915/ no domain	Orfs 2 and 3 overlaps
DIRS-16_XT	Chromosome 1	5346pb	DIRS-like	805 2103/Lap2alpha 1264-1866	2216 3997/RT-2531-2884 /RH-3206-3556 /MT-3578-3874	2626 5016/DNA_bre 4363-4938	Orfs 2 and 3 overlaps- phase +1 DNA-bre and phase +2 RT and RH
DIRS-17A_XT	Chromosome 5	5302pb	DIRS-like	779 2071/Lap2alpha 1145-1837	2247 3971 /RT- 2487-2852 /RH- 3183-3536	2123 4975/DNA_bre 4574-4894	Orfs 2 and 3 overlaps - phase +2 DNA_bre and phase+3 RT/RH
DIRS-17_XT	Chromosome 7	5368pb	DIRS-like	834 2138/Lap2alpha 1263-1901	2086 4038/RT- 2554-2919 /RH- 3247-3597	2190 5042/DNA_bre 4671-4961	Orfs 1, 2 and 3 overlaps - phase+1 RT/RH and phase +3 Lap2Alpha and DNA_bre
DIRS-18_XT	Chromosome 6	5685pb	DIRS-like	817 2319/Lap2alpha 1384-2079	2084 4255/RT- 2741-3088 /RH- 3422-3775	3196 5226/DNA_bre 4621-5139	Orfs 1, 2 and 3 overlaps - phase +1 Lap2Alpha and DNA_bre and phase+2 RT/RH
DIRS-19_XT	Chromosome 8	5643pb	DIRS-like	825 2321/Lap2alpha 1416-2093	2694 4244/RT- 2751-3104/RH- 3429-3779	3008 5236/DNA_bre 4586-5146	Orfs 2 and 3 overlaps phase +2 DNA_bre and phase +3 RT/RH and Lap2alpha
DIRS-20_XT	Chromosome 8	5075pb	DIRS-like	312 1835/Lap2alpha 1014-1622	1894 3735/RT- 2251-2616 /RH- 2947-3294	2847 4754/DNA_bre 4104-4664	Orfs 2 e 3 overlaps phase +1 RT e RH phase +3 Lap2Alpha e DNA_bre
DIRS-21A_XT	Chromosome 1	5716pb	DIRS-like	1014 2369/Lap2alpha 1449-2141	2728 4296/RT- 2629-3129 /RH- 3466-3816	2457 5273/DNA_bre 4896-5201	Orfs 2 and 3 overlaps phase +1 RT e RH phase +3 lap2alpha e DNA_bre
DIRS21_XT	Chromosome 3	5083pb	DIRS-like	418 3663/LAP2alpha 910-1533	418 3663/RT- 2164-2517 /RH- 2845-3195	1827 4652 /DNA_bre 4275-4532	just 2 Orfs; Orf1 phase+1 Lap2alpha/RT e RH; Orf2 phase +3 DNA_bre/ just 1 REPETIÇÃO
DIRS-22A_XT	Chromosome 8	5059pb/ 5298pb-recovered	DIRS-like	766 2286 / Lap2alpha 1444-2055	no ORF/ RT- 2714-3070/ RH- 3231-3554/MT-3567-3860	4389 5012/DNA_bre 4632-4940	just Orfs 1 e 3 ; phase+1 Lap2Alpha; phase +2 RT no ORF; phase +3 RH e MT no orf and DNA_bre
DIRS-22_XT	Chromosome 3	5608pb	DIRS-like	1168 2304/Lap2alpha 1471-2073	2675 4207/RT- 2732-3088 /RH- 3416-3766 /MT-3776-4075	2386 5142/no domain	Orfs 2 and 3 overlaps
DIRS-23_XT	Chromosome 3	5277pb	DIRS-like	668 2023/Lap2alpha 1136-1825	2199 3917/RT- 2433-2795 /RH-3126-3479	2066 4942/DNA_bre 4580-4825	Orfs 2 and 3 overlaps phase +2 DNA_bre and Lap2 alpha and phase +3 RT/RH
DIRS-24_XT	Chromosome 4	5211pb	DIRS-like	661 1953/Lap2alpha 1117-1716	2153 3856/RT- 2372-2737/RH- 3068-3418	2005 4878 no domain/ DNA_bre 4216-4788	Orfs 2 and 3 overlaps phase +1 DNA_bre and Lap2 alpha and phase +2 RT/RH - ORF no domain
DIRS-25A_XT	Chromosome 3	5316pb	DIRS-like	725 1897/Lap2alpha 1010-1678	1773 3794/ RT-2322-2675/ RH- 3003-3356	2834 4807/DNA_bre 4205-4732	Orfs 1, 2 and 3 overlaps phase+2 Lap2alpha and DNA_bre and phase +3 RT/RH - no todas repetitions
DIRS-25_XT	Chromosome 8	5504pb	DIRS-like	850 2247/Lap2alpha 1360-2025	2326 4143/RT- 2671-3024/RH- 3352-3711/MT-3712-4017	3174 5150/DNA_bre 4554-5075	Orfs 2 and 3 overlaps phase +1 Lap2alpha RT and RH phase +3 DNA_bre
DIRS-26A_XT	Chromosome 9	5370pb	DIRS-like	900 2057/Lap2alpha 1212-1814	2344 3960/RT- 2485-2841/RH- 3169-3519/MT- 3532-3837	2772 4982/DNA_bre 4329-4904	Orfs 2 and 3 overlaps phase +1 RT, RH and MT phase +3 lap2alpha and DNA_bre
DIRS-26_XT	Chromosome 3	5415pb	DIRS-like	657 2102/Lap2alpha 1257-1859	2365 4005/RT- 2530-2886/RH-3214-3564 /MT-3577-3882	2628 5027/ DNA_bre 4365-4949	Orfs 2 and 3 overlaps phase +1 RT, RH e MT phase +3 lap2alpha and DNA_bre
DIRS-27A_XT	Chromosome 9	5061pb	DIRS-like	894 1871/Lap2alpha 1251-1640	1549 2244/RT- 2229-2438//2306 3661/RH-2891-3241/MT- 3263-3469	2713 4683/no domain	Orf 2 broken
DIRS-27_XT	Chromosome 3	5611pb	DIRS-like	1121 2314/Lap2alpha 1487-2089	2073 3038/RT- 2742-2996//3152 4195/RH-3425-3775/MT- 3797-3994	3025 5220/DNA_bre 4858-5139	Orf 2 broken and overlap with 3 phase +1 DNA_bre phase +2 Lap2alpha, RH and MT phase +3 RT
DIRS-28_XT	Chromosome 1	5644pb	DIRS-like	858 2315/Lap2alpha 1401-2087	2473 4215/RT- 2746-3099/RH- 3424-3783	2379 5228/DNA_bre 4584-5159	Orfs 2 and 3 overlaps phase +1 RT e RH phase +3 Lap2alpha and DNA_bre
DIRS-29_XT	Chromosome 8	5665pb	DIRS-like	no ORF1/lap2alpha 1453-2064	2447 4228/RT- 2720-3073/RH- 3395-3745/MT- 3770-4052	2353 5199/DNA_bre 4555-5115	Orfs 2 and 3 overlaps phase +1 DNA_bre and Lap2 alpha e phase +2 RT/RH
DIRS-30_XT	Chromosome 1	5781pb	DIRS-like	1031 4351/Lap2alpha 1598-2263	1031 4351/RT- 2903-3244/RH- 3569-3925	2560 5370/DNA_bre 4768-5277	just 2 Orfs overlaps. A orf 1 have Lap2alpha, RT and RH na phase +2 e Orf 2 DNA_bre phase +1
DIRS-31_XT	Chromosome 6	5691pb	DIRS-like	848 2347 /Lap2alpha 1472-2095	2373 4247/RT-2778-3131 /RH- 3456-3812/MT- 3828-4112	2696 5263/DNA_bre 4604-5176	Orfs 2 and 3 overlaps phase +2 Lap2alpha and DNA_bre phase+3 RT, RH and MT
DIRS-32_XT	Chromosome 4	5187pb	DIRS-like	793 1941/Lap2alpha 1051-1722	1943 3832/RT- 2360-2704/RH- 3041-3394/MT- 3401-3631	2020 4827/DNA_bre 4243-4743	Orfs 2 and 3 overlaps phase+1 Lap2alpha and DNA_bre phase +2 RT, RH and MT
DIRS-33_XT	Chromosome 6	4146pb	DIRS-like	1068 1433/Lap2alpha 1071-1421	no ORF/ RH- 2061-2357	2273 3793/DNA_bre 3167-3724	Orf1 broken and don't have Orf2
DIRS-34A_XT	Chromosome 5	5490pb	DIRS-like	808 2205/Lap2alpha 1372-1974	2492 4108/RT- 2633-2989/RH- 3329-3667/MT- 3680-3985	2920 5130/DNA_bre 4747-5055	Orfs 2 and 3 overlaps phase +1 Lap2alpha and DNA_bre phase +2 RT,RH and MT
DIRS-34_XT	Chromosome 7	2880pb/4728pb-recovered	DIRS-like	899 1141/Lap2alpha 794-1132	1262 2854/RT- 1403-1756/ 2244 2570/ RH- 2076-2411/MT- 2417 2456	3418 3876/DNA_bre 3493-3801	Orf 2 broken - phase+1 DNA_bre phase +2 Lap2alpha and RT phase +3 RH
DIRS-35_XT	Chromosome 7	5900pb	DIRS-like	1591 2505/Lap2alpha 1630-2265	2270 3097/RT- 2910-3074/ 3247 4380/RH- 3559-3915/MT- 3921 4019	3930 5363/DNA_bre 4989-5297	Orf 2 broken and overlap with Orfs 1 and 3 phase +1 Lap2alpha RT and RH phase+3 RT and DNA_bre (RT broken)
DIRS-36A_XT	Chromosome 6	5595pb	DIRS-like	1343 2305/Lap2alpha 1469-2080	2442 3194/RT- 2733-3086/ 3253 3960/RH- 3505-3729	3852 5180/DNA_bre 4572-5084	Orf 2 broken and RH broken phase +1 RH phase+2 Lap2alpha phase+3 RT and DNA_bre
DIRS-36B_XT	Chromosome 7	5562pb	DIRS-like	805 2262/Lap2alpha 1426-2037	2420 3151/RT- 2693-3046/ RH- 3364-3723	3393 5156/DNA_bre 4506-5060	Orf 2 broken and overlap com orf 3 phase +1 Lap2alpha and RH phase+2 RT phase+3 DNA_bre
DIRS-36_XT	Chromosome 1	5415pb	DIRS-like	804 2252/Lap2alpha 1416-2027	2410 4143/RT- 2683-3036/RH- 3358-3717	3216 5168/DNA_bre 4560-5072	Orfs 2 and 3 overlaps phase+1 RT and RH phase +3 Lap2alpha and DNA_bre
DIRS-37A_XT	Chromosome 4	5123pb/5602pb-recovered	DIRS-like	823 2295 /Lap2alpha 1471-2070	2273 4189/RT- 2726-3079/RH- 3404-3757/MT- 3776-4060	2644 4941 no domain/DNA_bre 4955-5122	Orfs 1, 2 and 3 overlaps phase+1 Lap2alpha phase+2 RT,RH,MT and DNA-bre
DIRS-37_XT	Chromosome 1	5643pb	DIRS-like	619 2304/Lap2alpha 1429-2079	2678 4198/ RT- 2735-3088/RH- 3413-3769/MT- 3785-4069	2653 5217/DNA-bre 4549-5133	Orfs 2 and 3 overlaps phase +1 Lap2alpha and DNA_bre phase +2 RT,RH and MT
DIRS-38_XT	Chromosome 3	5221pb	DIRS-like	823 1950/Lap2alpha 1117-1719	2321 3850/RT-2378-2722 /RH- 3062-3418/MT- 3423 3495	2890 4863/DNA_bre 4240-4794	Orfs 2 and 3 overlaps phase +1 Lap2alpha and DNA_bre phase +2 RT,RH and MT
DIRS-39_XT	Chromosome 8	5484pb	DIRS-like	1248 2273/Lap2alpha 1428-2048	2644 4170/RT- 2701-3042/RH- 3385-3729	3135 5183/no domain	Orfs 2 and 3 overlaps phase +1 RT and RH phase +3 lap2alpha
DIRS-40_XT	Chromosome 1	5448pb	DIRS-like	681 2132/Lap2alpha 1281-1904	2293 4032/RT- 2566-2919/RH- 3241-3594	3654 5045/DNA_bre 4671-4961	Orfs 2 and 3 overlaps phase +1 RT e RH phase +3 lap2alpha and DNA_bre
DIRS-41A_XT	Chromosome 9	2952pb/5431pb-recovered	DIRS-like	82 1269/Lap2alpha 376-1050	1040 3166/RT- 1697-2050/RH-2378-2722 /MT-2744-3040	2200 4176/no domain	Orfs 2 and 3 overlaps phase +1 Lap2alpha phase +2 RT/RH and MT
DIRS-41_XT	Chromosome 2	5212pb	DIRS-like	908 1993/Lap2alpha 1100-1774	2315 3841/RT- 2372-2725/RH- 3053-3397/MT- 3419-3721	2791 4851/no domain	Orfs 2 and 3 overlaps phase +2 lap2alpha RT/ RH and MT
DIRS-42_XT	Chromosome 9	5710pb	DIRS-like	1823 2407/Lap2alpha 1496-2194	2565 4412/RT- 2679-2972//298 4305/RT 2962/RH- 3517-3867/MT- 3874-3968	4474 5325/DNA_bre 4705-5241	Orf 2 broken-Orfs 2 and 3 overlaps phase+1 RT/RH/MT/DNA_bre phase+2 lap2alpha phase+3 RT
DIRS-43_XT	Chromosome 9	5156pb	DIRS-like	1106 4804/Lap2alpha 1004-1655	1106 4804/RT- 2312-2638// 2682 3785/RH- 2994-3347	1106 4804/DNA_bre 4427-4729	Orf 1 Lap2alpha, RT and DNA_bre na phase +2 and RH in phase +3
DIRS-44_XT	Chromosome 2	4762pb	DIRS-like	1157 1567/Lap2alpha 959 1413	1588 2535/RT- 2110-2475//2517 3455/RH- 2664-3017	2537 4459/DNA_bre 4088-4378	Orfs 2 and 3 overlaps phase +1 RT phase+2 Lap2alpha and DNA_bre phase+3 RH
DIRS-45_XT	Chromosome 2	5054pb	DIRS-like	687 1910/Lap2alpha 1029-1691	1642 3807/RT-2335-2688/RH- 3016-3375	1989 4820/DNA_bre 4209-4730	Orfs 1,2 and 3 overlaps phase +1 RT and RH phase +3 Lap2alpha and DNA_bre
DIRS-46_XT	Chromosome 10	5239pb	DIRS-like	1585 2004/Lap2alpha 1609-1776	1727 3907/RT- 2432-2785 /RH- 3113-3466/MT- 3485-3787	no ORF3/DNA_bre 4499-4825	Orf 1 and 2 overlaps phase +1 lap2alpha phase +2 RT/RH/MT and DNA_bre
DIRS-47_XT	Chromosome 7	3912pb/4490pb-recovered	DIRS-like	573 1175/Lap2alpha 645-944	928 2202/RT- 1603-1956// 2548 3078/RH- 2284-2637	1698 3851/no domain	Orfs 1,2 and 3 overlaps phase +1 RT and RH phase +3 Lap2alpha - Orf 2 broken
DIRS-48_XT	Chromosome 1	5153pb	DIRS-like	795 1550/Lap2alpha 1044-1517	2120 2977/RT- 2345-2698// 2002 3984/RH- 3013-3363	3815 4885/DNA_bre 4163-4723	Orfs 2 and 3 overlaps - Orf 2 broken and Lap2alpha broken phase +1 Lap2alpha/RH phase+2 RT/DNA_bre phase +3 Lap2alpha
DIRS-49_XT	Chromosome 5	5152pb	DIRS-like	716 1537/Lap2alpha 1082-1735	2305 4812/RT- 2362-2715// no Orf/RH-3008-3367	2305 4812/DNA_bre 4210-4725	RT e DNA_bre in same Orf in phase +1 and phase +2 Lap2alpha and RH
DIRS-50_XT	Chromosome 1	5778pb	DIRS-like	1058 2482/Lap2alpha 1562-2266	2637 4376/RT- 2910-3263/RH-3591-3944/MT-3957-4241	no ORF/no domain	phase +2 Lap2alpha phase +3 RT/RH and MT
DIRS-51_XT	Chromosome 1	4911pb	DIRS-like	no Orf/Lap2alpha 1003-1560	1544 3805/RT- 2195-2548//2727 3377/RH-2721-2951 /MT- 2958-3242	3840 4370/DNA_bre 3981-4253	phase +1 Lap2alpha phase+2 RT and phase+3 RH and MT
DIRS-52_XT	Chromosome 5	5533pb	DIRS-like	1037 2335/Lap2alpha 1505-2107	2668 4191/RT- 2725-3069/RH- 3409-3750/MT- 3757-4083	4462 5079/DNA_bre 4585-5109	phase +1 RT/RH/MT and DNA_bre phase +2 lap2alpha
DIRS-53_XT	Chromosome 3	5457pb	NGARO	802 1593	1280 3109/RT- 1967-2323/RH- 2651-3022	3052 3984/DNA_bre 3493-3975//3936 4619/Hydro 4041-4553	phase +1 DNA_bre phase+2 RT/RH phase+3 Hydro
DIRS-54_XT	Chromosome 1	5141pb	NGARO	838 1752	1556 3286/RT-2141-2500/RH-2828-3196	3292 4164/DNA_bre 3691-4155//4403 4852/Hydro 4235-4762	no repetitions direct phase+1 DNA_bre phase+2 RT/RH and Hydro
DIRS-1_XL	Chromosome 1L	5294pb	DIRS-like	Sem Orf/Lap2alpha- 1163 1750	2017 3905/RT-2405-2755/RH- 3080-3427/MT- 3449-3754	3896 4321/DNA_bre 3932-4135	phase +2 all domains
DIRS-2_XL	Chromosome 4L	5742pb	DIRS-like	No Orf/Lap2alpha 2190-2474	2961 6470/RT- 3018-3371/RH-3686-3862//3811-3879	No Orf/No domain	phase+2 RH phase+3 Lap2alpha and RT
DIRS-3_XL	Chromosome 3	5387pb	DIRS-like	1106 1513/Lap2alpha 1247-1501//1536 2333/Lap2alpha 1530-1919	2454 2720/RT- 2553-2906// 3190 4011/RH- 3226-3570/MT- 3592-3888	3000 5030/DNA_bre 4656-4955	Orf 1 broken and domain broken - Orfs 2 and 3 overlap - Orf 2 broken phase +1 RH and MT phase +2 Lap2alpha phase +3 Lap2alpha/RT and DNA_bre
DIRS-4B_XL	Chromosome 6	5417pb	DIRS-like	1705 2157/Lap2alpha 1633-1923	2482 3126/RT- 2581-2925//2235 3926/RH- 3261-3377	4608 5066/DNA_bre 4683-4991	phase+1 Lap2alpha (broken) and RT phase+3 RH (quebrado) and DNA_bre
DIRS-4_XL	Chromosome 6	5433pb	DIRS-like	1549 2166/Lap2alpha 1258-1932	2186 4057/RT- 2591-2935/RH- 3272-3616/MT- 3638-3946	no Orf/DNA_bre 4698-4988	phase +1 Lap2alpha phase +2 RT/RH and MT phase +3 DNA_bre
DIRS-5_XL	Chromosome 6	5464pb	DIRS-like	1581 2198/Lap2alpha 1317-1964	1948 4101/RT- 2620-2964/RH- 3301-3651/MT- 3667-3975	4652 5110/DNA_bre 4457-5032	Orfs 1 and 2 overlaps phase+1 RT/RH/MT phase +2 DNA_bre phase+3 Lap2alpha
DIRS-6_XL	Chromosome 7	5456pb	DIRS-like	1657 2010/Lap2alpha 1618-1962	2284 4122/RT- 2629-2973/RH- 3304 3663 /MT- 3676-3834	2622 5099/DNA_bre 4464-5024	Orfs 2 and 3 overlaps phase +1 Lap2alpha/RT/RH/MT phase+3 DNA_bre
DIRS-7_XL	Chromosome 8	5470pb	DIRS-like	1849 2235/Lap2alpha 1816-2001	2438 4126/RT- 2660-3013/RH- 3341-3694/MT- 3707-4003	2314 5142/DNA_bre 4504-5055	Orfs 2 and 3 overlaps phase+1 DNA_bre phase +2 RT/RH and MT
DIRS-8_XL	Chromosome 8	5440pb	DIRS-like	1198 2175/Lap2alpha 1267-1941	2260 4065/RT- 2444-2629/RH- 3286-3624/MT- 3646-3933	4628 5086/DNA_bre 4433-5008	phase+1 Lap2alpha/RT/RH e MT phase +2 DNA_bre
DIRS-9_XL	Chromosome 9	5226pb	DIRS-like	677 1966/Lap2alpha 1070-1744	1869 3887/RT-2394-2747 /RH- 3075-3419/MT- 3441-3749	1970 4873/DNA_bre 4421-4804	Orfs 1,2 and 3 overlaps phase +2 Lap2alpha and DNA_bre phase +3 RT/RH and MT
DIRS-10_XL	Chromosome 1L	5852pb	DIRS-like	1112 2308/Lap2alpha 2112-2324	2597 3346/RT-2803-3111/RH-3650-3784	No orf/no domain	Orfs1 and 2 overlaps phase+1 RT phase+2 RH phase+3 Lap2alpha
DIRS-11_XL	Chromosome 5	5397pb	DIRS-like	785 2155/Lap2alpha 1325-1927	2350 4047/RT- 2584-2934 /RH- 3265-3612 /MT- 3613-3912	4391 5050/DNA_bre 4607-4960	phase +1 RT/RH and MT phase +2 Lap2alpha and DNA_bre
DIRS-12_XL	Chromosome 5	5567pb	DIRS-like	1756 2268/Lap2alpha 1444-2043	2642 3505/RT- 2699-3052/RH- 3371-3436	4139 5122/DNA_bre 4742-5050	domain RH quebrado phase +1 Lap2alpha phase +2 RT/RH e DNA_bre
DIRS-13_XL	Chromosome 10	5531pb	DIRS-like	732 2174/Lap2alpha 1353-1952	2152 4044/RT- 2605-2958/RH- 3283-3642/MT-3655-4014	no Orf/no domain	phase +1 RT/RH/MT phase +3 Lap2alpha
DIRS-14_XL	Chromosome 2	5569pb	DIRS-like	721 2214/Lap2alpha 1291-1989	2300 4126/RT- 2645-2998/RH- 3320-3679	4905 5123/DNA_bre 4749-5054	Orfs 1,2 and 3 overlaps phase+1 Lap2alpha phase +2 RT/RH and phase +3 DNA_bre
DIRS-15_XL	Chromosome 1L	5660pb	DIRS-like	Lap2alpha 1484-2035	RT- 2778-3062/RH- 3448-3540	no ORF/no domain	phase +1 RH phase+3 RT phase+2 Lap2alpha
DIRS-16_XL	Chromosome 9	5565pb	DIRS-like	1356 1961/Lap2alpha 1182-1739	2332 3882/RT- 2389-2742/RH- 3070-3414 /MT- 3454-3738	no ORF/no domain	phase +1 RT/RH and MT phase+3 Lap2alpha
DIRS-17_XL	Chromosome 8	5711pb	DIRS-like	no Orf/Lap2alpha 1508-2119	2034 4256/RT- 2775-3122/RH- 3450-3809	3326 5254/DNA_bre 4880-5185	phase +2 Lap2alpha and DNA_bre phase +3 RT and RH
DIRS-18_XL	Chromosome 7S	4918pb	DIRS-like	No Orf/no domain	No Orf/RT- 2397-2639/ 2805 3353/RH- 2961-3308	No Orf/ DNA_bre 4256-4504	phase+1 RT phase+2 DNA_bre phase+3 RT/RH
DIRS-19_XL	Chromosome 5S	5064pb	DIRS-like	1044 1826/Lap2alpha 1005-1610	2268 3119/RT-2099-2389//2401-2601 RH-2929-3279	No orf/DNA_bre 4117-4608	phase +1 RT/RH/DNA_bre phase+2 RT phase+3 Lap2alpha
DIRS-53_XTcopy1	Chromosome 3	5457pb	NGARO	802 1593	1280 3109/RT- 1967-2323/RH- 2651-3022	3052 3984/DNA_bre 3493-3975//3936 4619/Hydro 4041-4553	phase +1 DNA_bre phase+2 RT/RH phase+3 Hydro
DIRS-53_XTcopy2	Chromosome 1	5836pb	NGARO	1149 1733	3029 3370/RT- 3038-3265/3555 3833/RH- 3582-3818	4312 4725/DNA_bre 4261-4716	phase+1 DNA_bre phase+2 RT phase+3 RH
DIRS-53_XTcopy3	Scaffold 381	6107pb	NGARO	1860 2624	2293 3552/RT- 2998-3354/ 5342 5848/RH- 5399-5761	no Orf/no domain	phase+1 RT phase+2 RH
DIRS-53_XTcopy4	Scaffold 304	5192pb	NGARO	279 1175	1114 2691/RT- 1549-1905/RH- 2233-2604	2634 3566/DNA_bre 3075-3557//3518 4201/Hydro 3623-4135	phase+1 RT and RH phase +2 Hydro phase+3 DNA_bre
DIRS-53_XTcopy5	Chromosome 6	6225pb	NGARO	1250 2017	2365 3246/RT-2995-3216 / 3203 4141/ RH-3683-4054	4535 5017/DNA_bre 4523-4996//5191 5640/Hydro 5152-5559	no repetitions phase+1 RT and Hydro phase+2 RH and DNA_bre
DIRS-53_XTcopy6	Scaffold 42	6356pb	NGARO	2262 2636	2401 4152/RT-2995-3354 /RH- 3682-4053	4116 5024/DNA_bre 4527-5009 //5005 5643/Hydro 5059-5568	no repetitions phase +1 RT/RH/Hydro phase+2 DNA_bre
DIRS-53_XTcopy7	Scaffold 4622	4868pb	NGARO	263 1300	1080 2825/RT-1668-2027 /RH- 2355-2726	2885 3694/DNA_bre 3203-3679//3843 4325/Hydro 3915-4250	no repetitions phase +2 DNA_bre phase+3 RT/RH/Hydro
DIRS-53_XTcopy8	Scaffold 1487	5346pb	NGARO	295 1701	1445 3211/RT-2072-2431 /RH- 2759-3130	3184 4092/DNA_bre 3598-4071//4082 4711/Hydro 4121-4636	phase +1 DNA_bre phase+2 RT/RH/Hydro
DIRS-53_XTcopy9	Chromosome 4	6100pb	NGARO	87 587	590 1261/RT-995-1222 /1532 2134/ RH- 1694-2047	2525 2722/DNA_bre 2507-2719//4767 5763/ Hydro 5250-5729	phase+2 RT/RH/DNA_bre phase+3 Hydro
DIRS-53_XTcopy10	Scaffold 859	6125pb	NGARO	507 2594	2347 4143/RT- 2995-3354/RH- 3682-4050	4101 5027/DNA_bre 4530-4994//5237 5719/Hydro 5324-5674	no repetitions phase+1 RT/RH phase+2 Hydro phase+3 DNA_bre
DIRS-54_XTcopy1	Chromosome 6	5141pb	NGARO	838 1752	1556 3286/RT-2141-2500/RH-2828-3196	3292 4164/DNA_bre 3691-4155//4403 4852/Hydro 4235-4762	no repetitions direct phase+1 DNA_bre phase+2 RT/RH and Hydro
DIRS-54_XTcopy2	Chromosome 6	9135pb	NGARO	2273 3745	3546 5279/RT- 4134-4493/RH- 4821-5189	5285 5893/DNA_bre 5684-6148//6396 6845/ Hydro 6228-6755	no repetitions direct phase+2 DNA_bre phase+ RT/RH and Hydro
DIRS-54_XTcopy3	Chromosome 1	5214pb	NGARO	223 1695	1499 3229/RT- 2084-2443/RH- 2771-3139	3235 4107/DNA_bre 3634-4098//4346 4795/Hydro 4178-4705	just A1 and A2 phase +1 DNA_bre phase +2 RT/RH and Hydro
DIRS-54_XTcopy4	Chromosome 2	6202pb	NGARO	251 1165	969 2558/RT- 1554-1913/RH- 2241-2609	2705 3755/DNA_bre 3104-3568//3816 4235/Hydro 3648-4175	just B1 and B2 phase+2 DNA_bre phase +3 RT/RH and Hydro
DIRS-54_XTcopy5	Chromosome 9	5720pb	NGARO	273 1745	1549 3279/RT- 2134-2493/RH- 2821-3189	3285 4136/DNA_bre 3684-4127//4575 4824/Hydro 4207-4734	phase +1 RT/RH and Hydro phase +3 DNA_bre
DIRS-54_XTcopy6	Chromosome 5	7102pb	NGARO	239 1660	2354 3049/RT- 2261 2620/ 2875 3393/RH- 2935-3303	3399 4271/DNA_bre 3798-4262// 4510 4959/Hydro 4342-4869	no repetitions phase+1 RH and Hydro phase+2 RT and phase +3 DNA_bre
DIRS-54_XTcopy7	Scaffold 241	6368pb	NGARO	534 1808	1780 3357/RT- 2200-2559/RH- 2887-3258	3300 4229/DNA_bre 3801-4217// 4610 4939/Hydro 4358-4873	no repetitions phase+1 RT and RH phase +2 Hydro phase+3 DNA_bre
DIRS-54_XTcopy8	Scaffold 983	6296pb	NGARO	904 1872	1820 3388/RT- 2240-2599/RH- 2927-3298	3867 4244/DNA_bre 3786-4199// 4380 4868/Hydro 4392-4796	no repetitions phase +2 RT and RH phase+3 DNA_bre and Hydro
DIRS-54_XTcopy9	Scaffold 1188	5459pb	NGARO	no ORF	no ORF/RT- 2265-2624/3357 3606/ RH- 3357-3524	3572 4243/DNA_bre 4164-4487// no ORF/Hydro 4723-5115	phase +1 Hydro phase +2 DNA_bre phase+3 RT/RH
DIRS-54_XTcopy10	Chromosome 3	5807pb	NGARO	205 1899	1643 3435/RT- 2288-2647/RH- 2975-3346	3992 4312/DNA_bre 3977-4303//4290 4922/Hydro 4344-4871	phase+2 RT/RH and DNA_bre phase+3 Hydro
DIRS-53_XTcopy1XL	Chromosome 8L	5228pb	NGARO	385 1653	1337 3169/RT-2027-2383/RH- 2711-3082	No Orf/DNA_bre 3672-4013/Hydro 4185-4457	just A1 and A2 phase +1 DNA_bre/ Phase +3 RT/RH
DIRS-53_XTcopy2XL	Chromosome 1S	5598pb	NGARO	318 1652	1336 3168/RT-2026-2382/RH-2710-3081	3408 4040/DNA_bre 3564-4028/ 4227 4682/ Hydro 4110-4604	phase +2 DNA_bre and Hydro phase +3 RT/RH
DIRS-53_XTcopy3XL	Chromosome 1S	5600pb	NGARO	307 900	1325 3157/RT-2015-2371/RH-2699-3070	3397 4029/DNA_bre- 3553-4017/4215 4670- Hydro 4092-4604	phase +1 Hydro phase+2 DNA_bre phase +3 RT/RH
DIRS-53_XTcopy4XL	Chromosome 8S	6217pb	NGARO	310 1260	1317 3149/RT-2007-2363 /RH- 2691-3062	3507 4022/DNA_bre 3546-3983/4208 4663 Hydro-4085-4597	Phase +1 Hydro phase +2 RT/RH/DNA_bre
DIRS-53_XTcopy5XL	Chromosome 2S	9296pb	NGARO	1477 2202	2500 4332/RT-3190-3546/RH- 3874-4245	4572 5204/DNA_bre4728-5192/No orf/Hydro-5363-5692	Just B1 and B2 Phase +1 Hydro phase +2 DNA_bre phase +3 RT/RH
DIRS-53_XTcopy6XL	Chromosome 8L	8607pb	NGARO	No Orf	2000 3625/RT-2690-3046/RH- 3374-3598	No Orf/No domain	Just B1 and B2 Phase +2 RT/RH
DIRS-53_XTcopy7XL	Chromosome 3S	5584pb	NGARO	309 1259	1316 2830/RT-2006-2362/RH- 2815-3060	3387 4019/DNA_bre 3543-4007/4205 4660- Hydro 4082-4594	Phase +1 DNA_bre phase+2 Hydro phase+3 RT/RH
DIRS-53_XTcopy8XL	Chromosome 2L	6035pb	NGARO	329 2092	1872 3617/RT-2460-2819 /RH- 3147-3518	3566 4486/DNA_bre 3995-4471/4528 5106 Hydro- 4705-5040	phase +1 Hydro phase+2 DNA_bre phase +3 RT/RH
DIRS-53_XTcopy9XL	Chromosome 5S	5922pb	NGARO	327 2090	1870 3615/RT-2458-2817/RH- 3145-3516	4085 4483/DNA_ bre 3992-4468/4525 5079/Hydro 4702-5058	phase +1Hydro phase+2 DNA_bre phase +3 RT/RH
DIRS-53_XTcopy10XL	Chromosome 2L	7240pb	NGARO	1443 2597	3089 4834/RT- 3677-4036/RH- 4364-4735	5694 6320/DNA_bre 5235-5471/Hydro 5919-6254	Phase +1 DNA_bre/Hydro phase+2 RT/RH
DIRS-54_XTcopy1XL	Chromosome 5L	5622pb	NGARO	205 1194	1396 3219/RT- 2074-2433/RH- 2761-3132	3409 4095/DNA_bre 3625-4086/4331 4741 Hydro 4169-4693	Phase +2 RT/RH/DNA_bre phase +3 Hydro
DIRS-54_XTcopy2XL	Chromosome 5L	6176pb	NGARO	968 2158	1950 3674/RT- 2526-2885/RH- 3213-3584	3632 4549/DNA_bre 4073-4531/4697 5152 Hydro 4592-5068	Phase +1 DNA_bre/Hydro phase+2 RT/RH
DIRS-54_XTcopy3XL	Chromosome 1S	6174PB	NGARO	1367 2149	1941 3665/RT- 2517-2876/RH- 3204-3575	3623 4540/DNA_bre 4064-4522/Hydro 4640-5062	Phase +2 DNA_bre phase +3 RT/RH
DIRS-54_XTcopy4XL	Chromosome 2S	6172pb	NGARO	244 2145	1937 3661/RT- 2513-2872/RH- 3200-3571	3619 4536/DNA_bre 4060-4518/4684 5139 Hydro 4579-5058	Phase +1 DNA_bre/Hydro phase+2 RT/RH
DIRS-54_XTcopy5XL	Chromosome 1L	6155pb	NGARO	211 1683	1490 2869/RT- 2072-2431/RH-2948-3130	3193 3738/DNA_bre 4661-4981/4634 5023 Hydro 5090-5581	Phase +3 RT/RH/DNA_bre/Hydro
DIRS-54_XTcopy6XL	Chromosome 1S	7942pb	NGARO	1308 3209	3670 4725/RT-3577-3936/RH- 4264-4635	4683 5600/DNA_bre 5124-5582/ 5748 6203/ Hydro 5703-6122	No repetitions Phase +2 Hydro phase+3 RT/RH/DNA_bre
DIRS-54_XTcopy7XL	Chromosome 5S	6174pb	NGARO	262 2163	2624 3679/RT- 2531-2890/RH-3218-3589	3637 4554/DNA_bre 4078-4536/4702 5157 Hydro 4657-5076	Phase +2 DNA_bre/Hydro phase+3 RT/RH
DIRS-54_XTcopy8XL	Chromosome 5S	6184pb	NGARO	969 2159	1951 3675/RT- 2527-2886/RH-3214-3585	3633 4550/DNA_bre 4074-4532/4698 5153/Hydro- 4650-5072	Phase +2 DNA_bre/Hydro phase+3 RT/RH
DIRS-54_XTcopy9XL	Chromosome 7S	8203pb	NGARO	2484 3965	3754 5481/RT- 4336-4692/RH- 5020-5391	5454 6356/ DNA_bre 5901-6338/6390 6962/Hydro 6486-6893	Phase +2 DNA_bre/Hydro phase+3 RT/RH
DIRS-54_XTcopy10XL	Chromosome 1L	6052pb	NGARO	221 2122	1911 3638/RT- 2493-2849/ RH- 3177-3548	3596 4513/DNA_bre 4058-4495/4547 5119 Hydro 4706-5062	Phase +2 DNA_bre/Hydro phase+3 RT/RH
DIRS-37_XTcopy1	chromosome 8	5643pb	DIRS-like	619 2304/Lap2alpha 1429-2079	2678 4198/ RT- 2735-3088/RH- 3413-3769/MT- 3785-4069	2653 5217/DNA-bre 4549-5133	Orfs 2 and 3 overlaps phase +1 Lap2alpha and DNA_bre phase +2 RT,RH and MT
DIRS-37_XTcopy2	chromosome 8	5654pb	DIRS-like	849 2315/Lap2alpha 1440-2090	2664 5228/RT-2746-3099/RH-3424-3780/MT- 3796-4080	2689 4209/DNA_bre 4560-5144	Orfs 2 and 3 overlaps phase+1 RT/RH/MT phase+2 lap2alpha DNA_bre
DIRS-37_XTcopy3	chromosome 2	5040pb	DIRS-like	788 1699/Lap2alpha 824-1474	2047 4611/RT-2129-2482 /RH-2807-3160 /MT- 3179-3463	2072 3592/DNA_bre 3928-4527	Orfs 2 and 3 overlaps phase+1 DNA_bre phase +2 Lap2alpha/ RT/RH and MT
DIRS-37_XTcopy4	scaffold 70	4501pb	DIRS-like	no Orf/no domain	1533 3053/RT- 1590-1943/RH- 2268-2624/MT- 2640-2924	2141 4072/DNA_bre 3404-3988	Orfs 2 and 3 overlaps phase+2 DNA_bre phase+3 RT/RH/MT
DIRS-37_XTcopy5	chromosome 4	5399pb	DIRS-like	587 2059/Lap2alpha 1235-1834	2037 3953/RT-2490-2843/RH-3168-3521/MT- 3540-3824	2408 4705/DNA_bre 4719-4886	Orfs 2 and 3 overlaps phase+2 DNA_bre phase+3 RT/RH/MT
DIRS-37_XTcopy6	Chromosome 7	5448pb	DIRS-like	1450 1944/Lap2alpha 1501-1827	2089 3489/RT-2542-2895/RH-3220-3573/MT- 3592-3876	2460 4160/No domain/No Orf/DNA_bre 4758-4931	Orfs 2 and 3 overlaps phase +1 Lap2alpha/RT/RH/MT phase +3 DNA_bre
DIRS-37_XTcopy7	Chromosome 1	5637pb	DIRS-like	850 2307/Lap2alpha 1393-2079	2465 4207/ RT- 2738-3091/RH3416-3775	3289 5220/ DNA_bre 4576-5151	Orfs 2 and 3 overlaps phase +1 Lap2alpha/DNA_bre phase+2 RT/RH
DIRS-37_XTcopy8	Chromosome 6	5690pb	DIRS-like	845 2344/Lap2alpha 1469-2092	2517 4244/RT- 2775-3128/RH- 3453-3809	4100 5260/DNA_bre 4601-5173	Orfs 2 and 3 overlaps phase +2 Lap2alpha/DNA_bre phase+3 RT/RH
DIRS-37_XTcopy9	Chromosome 9	5164pb	DIRS-like	1276 2169/Lap2alpha 1318-1932	2021 4051/RT-2600-2953/RH-3278-3625	2518 4878/DNA_bre 4811-4978	Orfs 1, 2 and 3 overlaps phase+1 Lap2alpha phase+2 RT/RH/DNA_bre
DIRS-37_XTcopy10	Chromosome 3	5598pb	DIRS-like	811 2283/Lap2alpha 1453-2052	2438 4165/ RT-2711-3058/RH-3383-3739	3319 5184/DNA_bre 4579-5094	Orfs 2 and 3 overlaps phase +1 Lap2alpha/DNA_bre phase+2 RT/RH
DIRS-37_XTcopy1XL	Chromosome 3L	5644pb	DIRS-like	792 2273/Lap2alpha 1374-2051	2431 4173/ RT-2704-3057/RH-3382-3741/MT- 3754-4050	2337 5186/DNA_bre 4209-4412//4812-5069	Phase +1 RT/RH/MT phase +2 Lap2alpha/DNA_bre (broken)
DIRS-37_XTcopy2XL	Chromosome 6L	5652pb	DIRS-like	802 2283/Lap2alpha 1384-2061	2441 4183/RT-2714-3067/RH- 3392-3751/MT- 3764-4060	3763 5196/DNA_bre 4219-4422//4822-5079	Phase +1 Lap2alpha/DNA_bre phase +2 RT/RH/M
DIRS-37_XTcopy3XL	Chromosome 2S	5473PB	DIRS-like	752 2146/Lap2alpha 1334-2011	2304 4460/RT- 2566-2919/RH-3244-3603/MT-3616-3912	2710 4035/No domain	Phase +1 RT/RH/MT phase +2 Lap2alpha
DIRS-37_XTcopy4XL	Chromosome 9_10S	7092pb	DIRS-like	1785 3227/Lap2alpha 2328-3005	3205 5097/RT-3658-4011/RH-4336-4695/MT-4708-5067	5102 5947/DNA_bre 5162-5350	phase +1 RT/RH/MT phase+2 DNA_bre Phase +3 Lap2alpha
DIRS-37_XTcopy5XL	Chromosome 4L	5635pb	DIRS-like	1759 2244/Lap2alpha 1720-2022	2308 3570/RT-2519-2773//2695-3027/RH-3352-3711/MT- 3724-4020	2679 5156/DNA_bre 4782-5039	phase +1 Lap2alpha/RT/RH/MT phase +2 RT phase +3 DNA_bre
DIRS-37_XTcopy6XL	Chromosome 2S	5628pb	DIRS-like	785 1771/Lap2alpha 1366-2022	2621 4147/RT- 2678-3031/RH-3356-3715	3883 5166/No domain	phase +1 Lap2alpha phase +2 RT/RH
DIRS-37_XTcopy7XL	Chromosome 4L	5712pb	DIRS-like	1871 2383/Lap2alpha 1517-2158	2757 4283/RT- 2613-3164/RH- 3492-3851	2432 5284/No domain	phase +1 Lap2alpha phase +2 RT/RH
DIRS-37_XTcopy8XL	Chromosome 5L	5504pb	DIRS-like	797 4084/Lap2alpha 1385-2026	2325 4025/RT- 2355-2906/RH- 3234-3593	No orf/No domain	phase +2 Lap2alpha phase +3 RT/RH
DIRS-37_XTcopy9XL	Chromosome 4S	5628pb	DIRS-like	852 2294/Lap2alpha 1428-2069	2668 4191/RT- 2524-3075/RH- 3400-3750	2358 5210/No domain	phase +1 RT/RH phase +2 Lap2alpha
DIRS-37_XTcopy10XL	Chromosome 1L	5666pb	DIRS-like	1021 2298/Lap2alpha 1432-2073	2672 4195/RT- 2528-3079/RH- 3404-3754	2362 5214/No domain	phase +1 Lap2alpha phase +2 RT/RH
